# Supplementary material
Source: PubMed Central journal article supplement (PMC2887480)
Supplement: NIHMS185912-supplement-1.pdf [file NIHMS185912-supplement-1.pdf]

**Supplementary File:**

**The AIM2 inflammasome is essential for host-defense against cytosolic  
bacteria and DNA viruses.**

Vijay A.K. Rathinam<sup>1</sup>, Zhaozhao Jiang<sup>1</sup>, Stephen Waggoner<sup>2</sup>, Shruti Sharma<sup>1</sup>, Leah E. Cole<sup>3</sup>,  
Lisa Waggoner<sup>1</sup>, Sivapriya Kailasan Vanaja<sup>4</sup>, Brian G. Monks<sup>1</sup>, Sandhya Ganesan<sup>1</sup>, Eicke  
Latz<sup>1, 5</sup>, Veit Hornung<sup>5</sup>, Stefanie N. Vogel<sup>3</sup>, Eva Szomolanyi-Tsuda<sup>2</sup> and Katherine A.  
Fitzgerald<sup>1,\*</sup>.

## Supplemental figure legends.

**Supplemental Fig. 1. *Aim2* genomic locus and gene trap genomic locus.** a, The organization of the genomic locus of *Aim2* and the CSG445 Gene Trap locus is shown. B, Schematic of the *Aim2* and *Aim2* genetrapped genomic locus, mRNA and protein showing the position of RT-PCR results used in (c). RT-PCR analysis of ES cell line showing integration of vector.

**Supplemental Fig. 1. Site of integration of pGT0lxf vector in *Aim2* gDNA.** Long range PCR followed by DNA sequencing led to the identification of the genetrapped integration site within intron 6 of *Aim2* as shown.

**Supplemental Fig. 1. Analysis of splenic NK cells in MCMV infected mice.** (a) Gating strategy for NK cell analysis in a representative *Aim2*<sup>+/+</sup> mouse. Doublet events were excluded by gating based on FSC-A and FSC-W. Live lymphocyte populations were determined based on FSC-A and SSC-A. CD3-negative cells were gated and analyzed for expression of the NK cell markers NKp46 and NK1.1. (b) Expression levels of NK1.1, Ly49H, and NKp46 were compared on gated NK cells in C57BL/6 (top plots, shaded histogram), *Asc*<sup>-/-</sup> (top plots, line histogram), *Aim2*<sup>+/+</sup> (bottom plots, shaded histogram), and *Aim2*<sup>-/-</sup> (bottom plots, line histogram) spleens. Representative overlay histograms are shown. (c) The proportions and MFI of Ly49H expression on splenic NK cells for individual mice (n = 4/group) are plotted. *P* values were determined by unpaired two-tailed Student's *T* test.

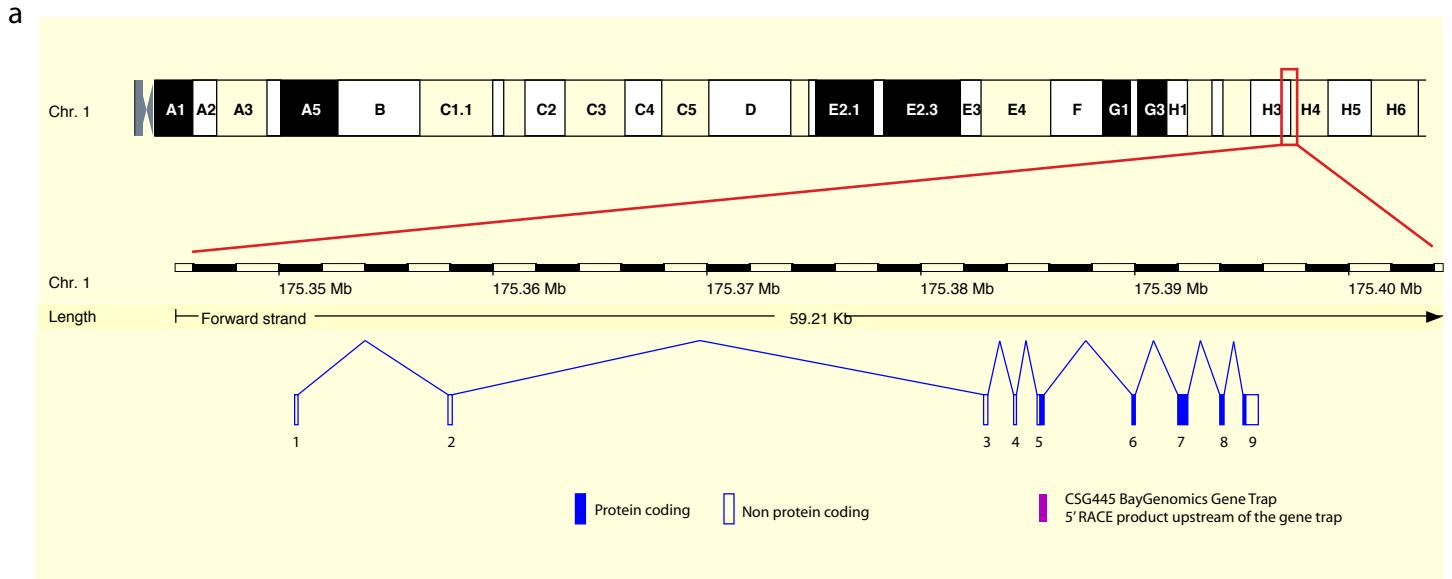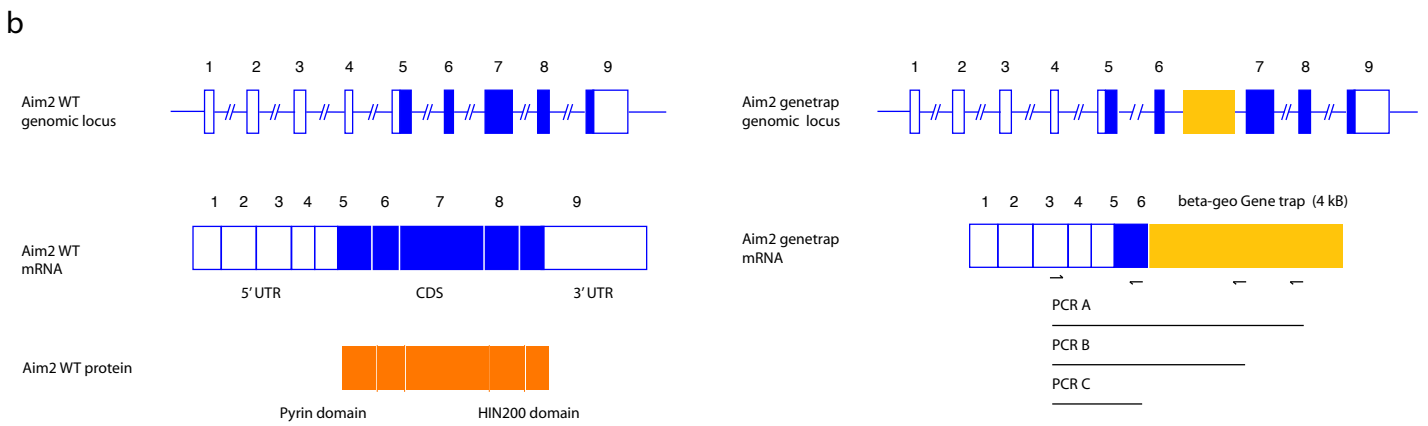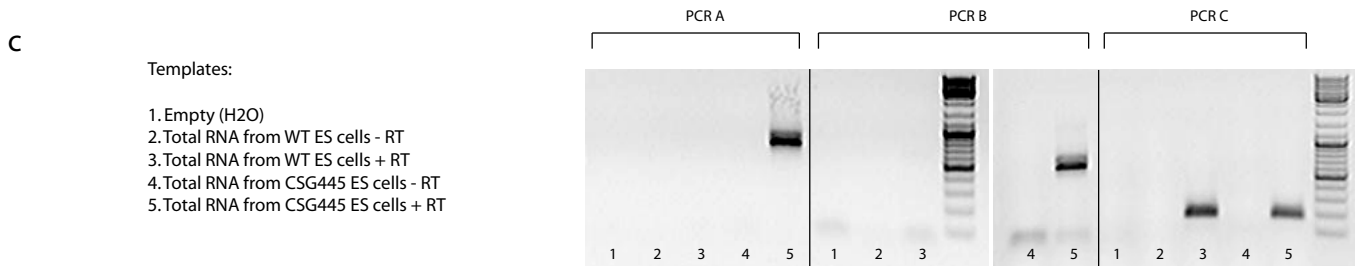

Supplemental Figure 1

ctgaacgtaaactcatgaccaatacaaaagaa  
gagaggaacacagaaggtagaaaatagaagtcaagctgaaaactgctctg  
ctgcctctgccacccgcagtgacaatgactttaaggaacaggctgctaca  
gaagtctgtcctcaagctaaagtggttagtgacactcttatcactatccc  
tctcctccagcactcgaagccttctgttctttatctctgagcatacaaat  
caggaaaaccgggtacgataggagagatatgtctgcattacaaaaagaa  
aaatcacttctattcatcagcgtccatgccaggaagcttctaatttctg  
ccatgctctggacatgataacctgttgctatgttaacctctctttgacga  
aaactctgacagggaccttttccagtgagtatgtttcaggttgctctcag  
catcagttctgtgaggaggttaggatgaggggatggggaagtttcta  
gttcaatggaactgcagcaagaatttgacctgttccacaggagacttag  
ggtccagggatgccctcaggattgttgcaacgtagttggaaaacacagt  
cccttagtcacgatgtgcctgctcttattgtcatgaaatgactctttgt  
agcagaggggataaaactggaagagagtccttgtcccttagtcctgacag  
agcagcatatagggatccatcacaaaatccaccaagcatctgcaatttca  
ttttctgtaaagaaagtgtcatgaaacttcatagagaagcttaggctgtg  
cacaccattctatccagagcaccactcatttctctgtgtttggctcag  
aaatgtccagaattgtgaagaaaacaataaccaagtttaaatgttacatt  
ttggtaagcaccataaaaaatgcatattgtatagtcctgaaaaatccag  
taaaatgcctaggactgaagacaaaattctaaaatagttctcagtgaaact  
gatacttctctgctttggatcaaattgagagtgaggatgccgttcatcaa  
tcagctcacaggctcacatcccaaggttttgagagatccagttcaaagc  
atgtgctctgtgcctctctcttctctcagggctctcctttagttatggat  
tgtaattgcttttaaaatagtattgtttctgatacacacatgcatga  
acaaacacacagtcacatacagaaatgcgcacatgaacagtccttatta  
tttttaatttcttaatttgaagaacaaaataaacaacaaaactaaac  
aaaaactaatcccaggttatgtgggttatttgtgcatatccaataag  
gaatgcattataactttatcctttgttaaatcaattaaaatagtttggtat  
atttctctataaaaacatttaatttttatatgttgtattataagacctta  
tttgacaaaatccatttttgggtatttaaaagattttgatgattataac  
tataaataataagatgtaatttatgtaagccttaatatatgcttctaa  
aacatacacatgcgtgggcaaacacacatacatgcacattcctgtacaca  
gacacactatctcctattgctcttaatttcttaatctggaagaacaaaat  
ggcaagatgagaatttattcattccaagaataattcattcttctaagagt  
aatcttaccaggtagagttgactctaatttttaattctccttttaattca  
tctgtaggatctcatcccagatctcttcccttccctcacattgaatgatc  
tgcaatttctattatgcacaggaatattcctgggaatgtgcaggagctctg  
cgcacatcactgagcttctcactctgatgcaagagtcaattacatgctc  
agagttggaggggaaaaatagctgtagtagaattacaagaagacagagtc  
agattcagccccttgcaagtgttcaggattctgacacacacttttcatag  
caaagaagattctgattcaggaattttgtctccagagtcagtaaaactg  
ccccgtctgaacatagaacacaaaatatcccttagataatttttaggtctc  
caatctcttccctaacgttatctccattttcccttcaattcagcttctttc  
ttcctggggttttactgtgaatgaaggctgcttgggtaagtgtggacct  
agctaacatcttttctctctgtcacagcctcagaagaaacagatgggtgg  
cagaacaggaagccatcagagaagatttacagaaagatccacttgttgctc  
acgggtgctgaaagctataaatccctttgagtgtagactcaggaaggaag  
acaagagatatttcatgcaacagtgccacgggagacagattttttctttg  
taaaagttttaaacgcacagtttaaaagataaatttatcccaaaggagaca  
attaaaatatcaaaactacctttggcacagtaacttcatggaggtcaccag  
ttcctcagttgtggttgatgttgaatctaaccacgaagtcccaataacg  
ttgttaagagagccagggaaactcccaggattagtaaaactgaagattcag  
ccatgtggaacaattgtgaatgggctgtttaaagtccagaag

Exon 6

Genetrap integration site

Exon 7

Supplemental Figure 2

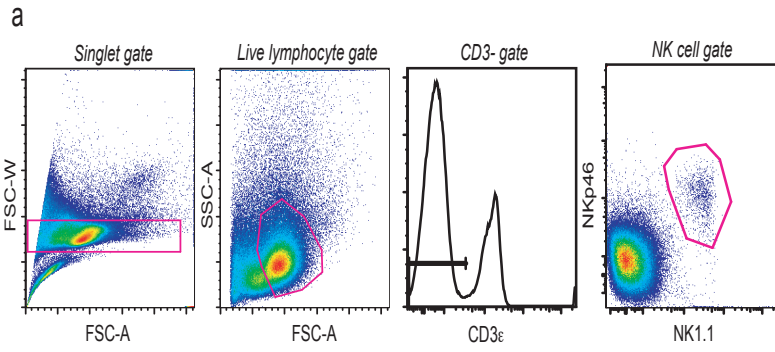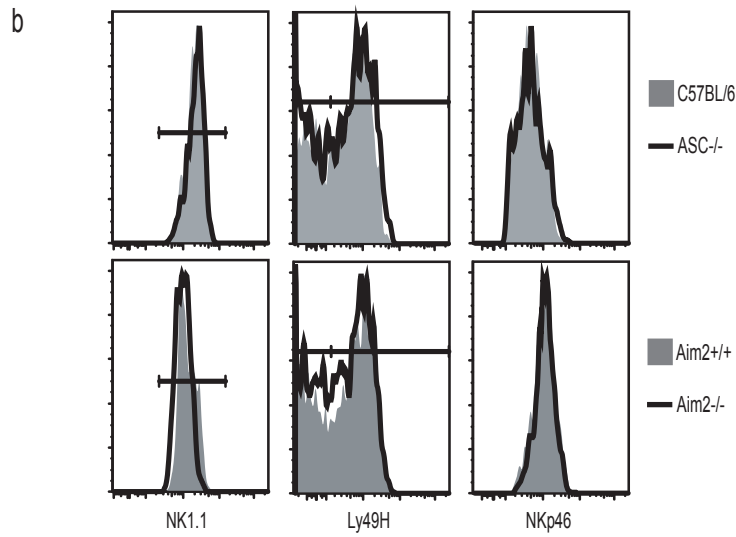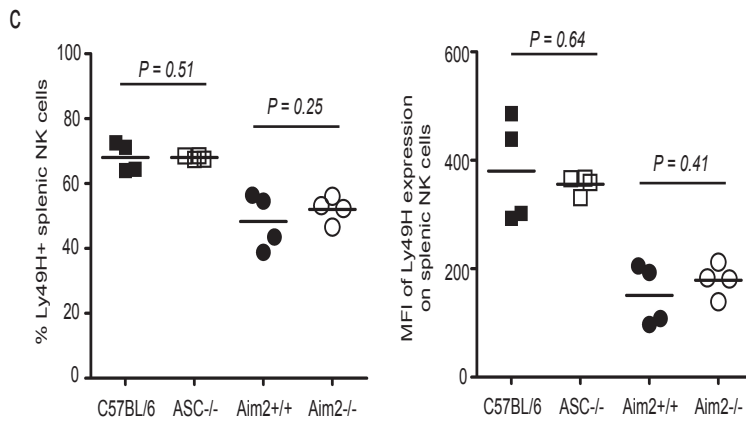

Supplemental Figure 3
